# Supplementary material
Source: Springer Nature journal article supplement (https://www.springermedizin.de/resource/supplementary/13051_2008_4_MOESM1_ESM.pdf/9669816)

Figure 1: Guidelines for management

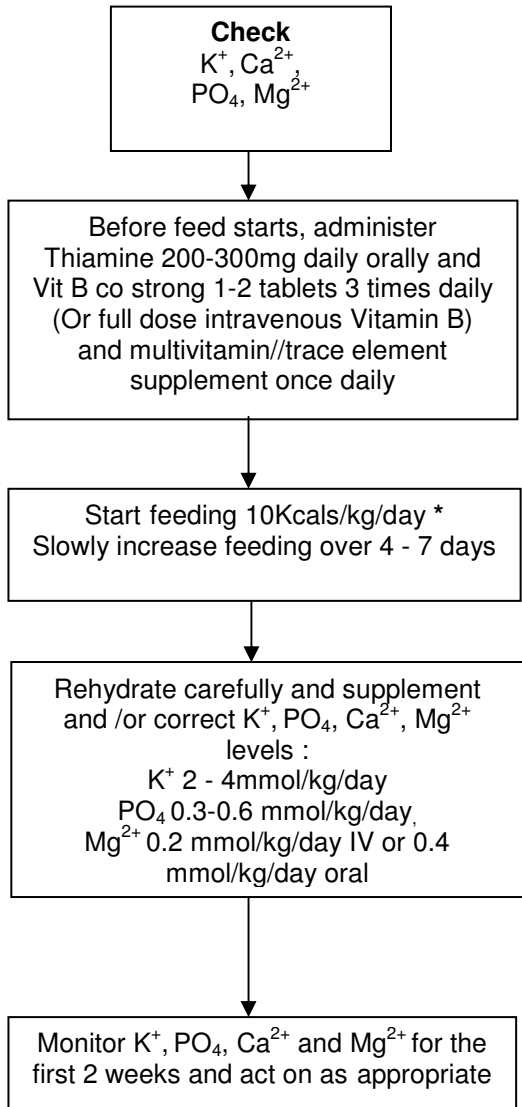

Supplement: MOESM1 [file 9669816]
